# Supplementary material for: SREBP1c-CRY1 signalling represses hepatic glucose production by promoting FOXO1 degradation during refeeding
Source: PubMed Central journal article supplement (PMC4947181; doi:10.1038/ncomms12180), 2016-07-14
Supplement: ncomms12180-s1.pdf [file ncomms12180-s1.pdf]

## Supplementary Figure 1

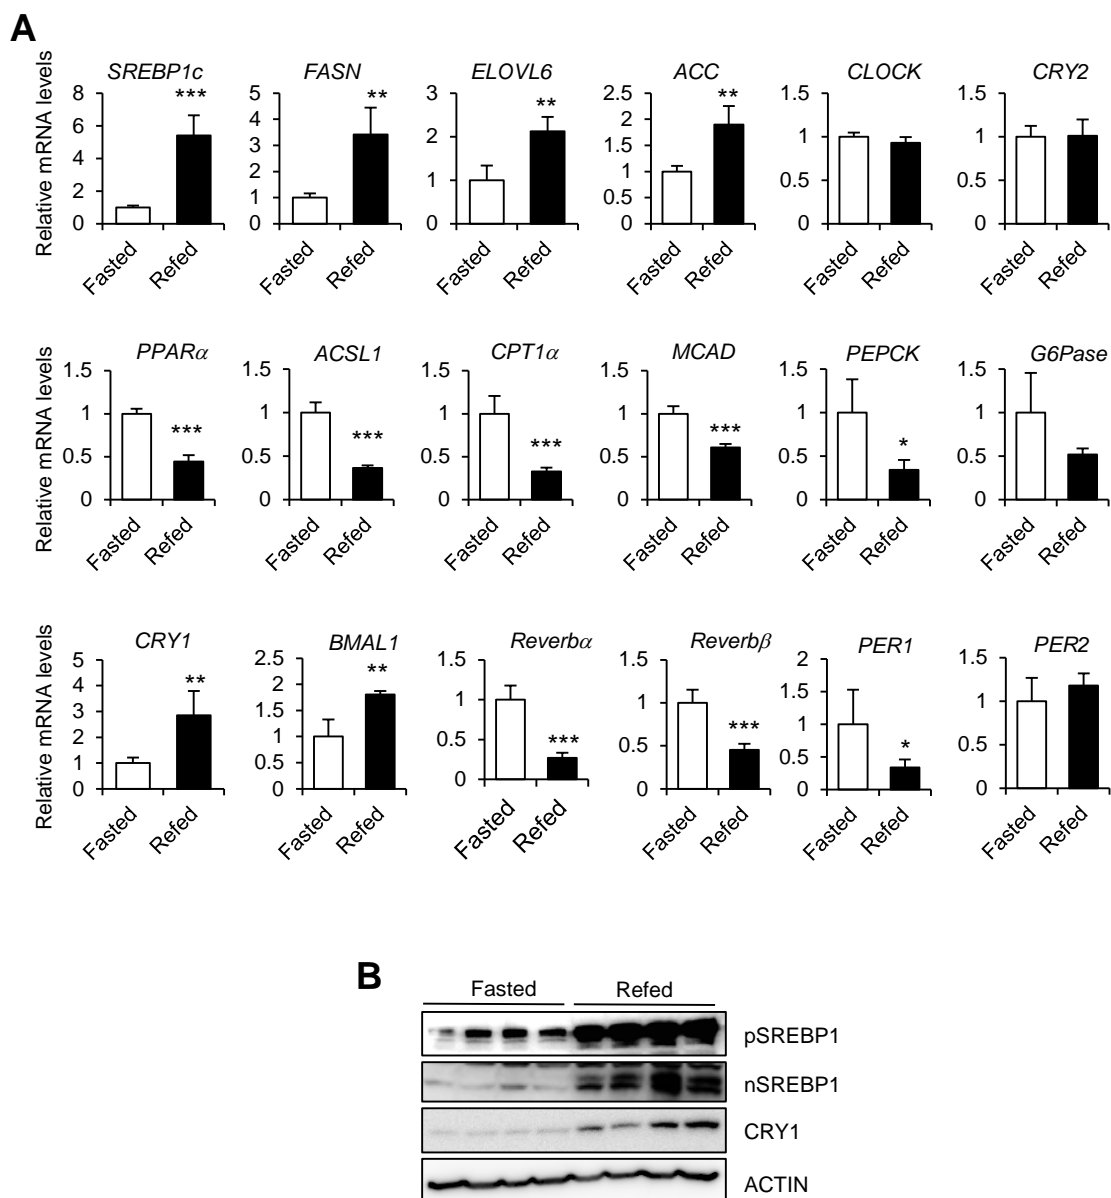

### Supplementary Figure 1. CRY1 is increased by feeding

(A and B) *C57BL/6* mice were fasted for 12 hours and then refed for 12 hours. Both fasted and refed mice were sacrificed at ZT 3. In the liver, levels of the *CRY1* mRNA (A) and CRY1 protein (B) were determined using qRT-PCR with normalization to *TBP* mRNA levels and western blotting, respectively. Data are represented as mean  $\pm$ SD,  $N=4$  for each group. \* $P<0.05$ , \*\* $P<0.01$  (Student's *t*-test).

Supplementary Figure 2

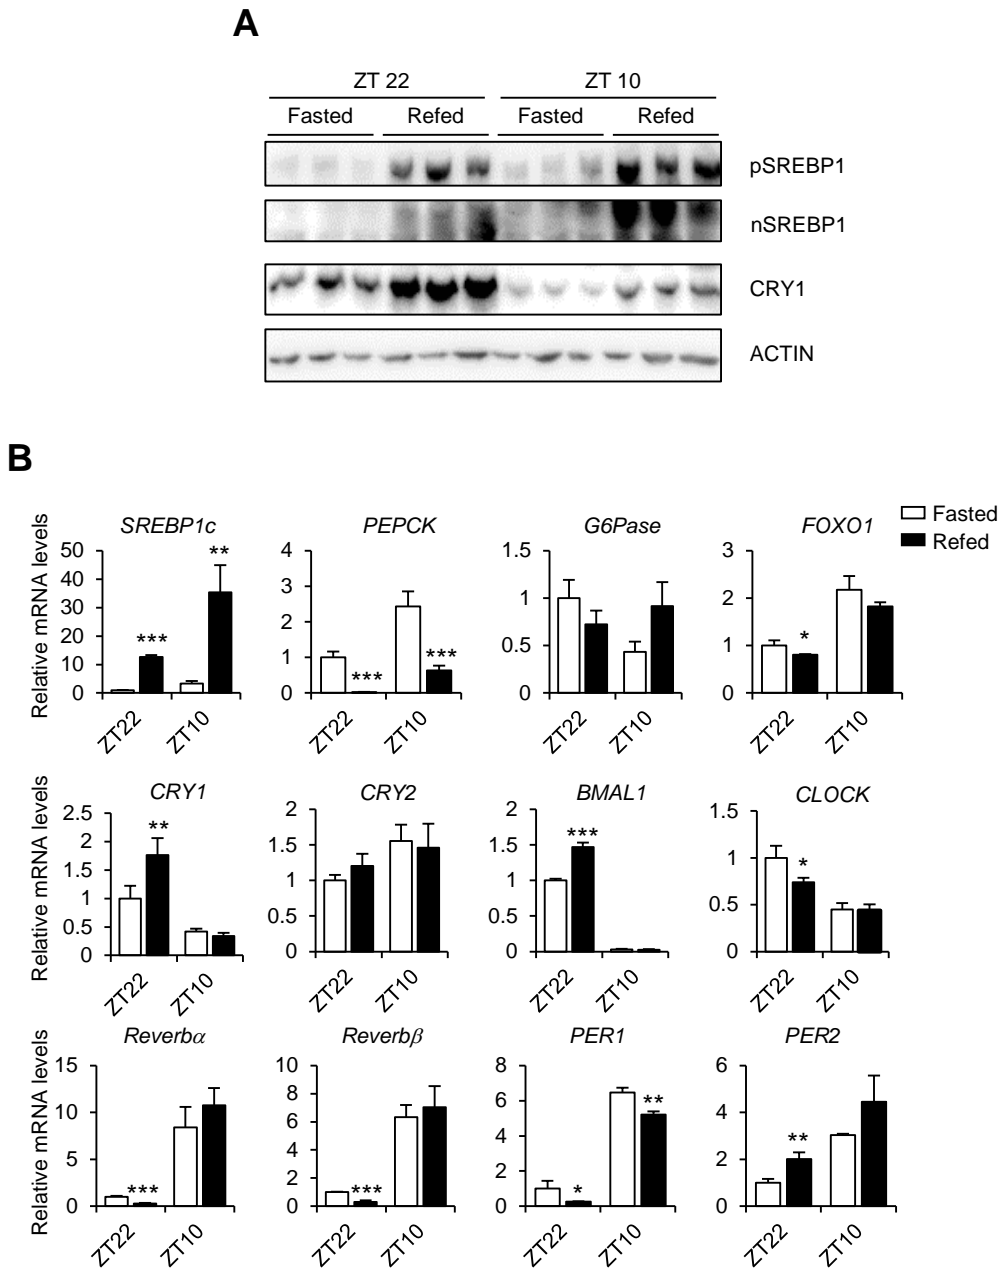

**Supplementary Figure 2. CRY1 is increased by feeding regardless of time periods**

(A and B) *C57BL/6* mice were fasted for 24 hours and then refed for 12 hours. Both fasted and refed mice were sacrificed at ZT 22 and ZT 10. In the liver, the levels of CRY1 protein (A) and *CRY1* mRNA (B) were determined using western blotting and qRT-PCR with normalization to *TBP* mRNA levels, respectively. Data are represented as mean  $\pm$ SD,  $N=3$  for each group. \* $P < 0.05$ , \*\* $P < 0.01$ , \*\*\* $P < 0.001$  (Student's *t*-test).

### Supplementary Figure 3

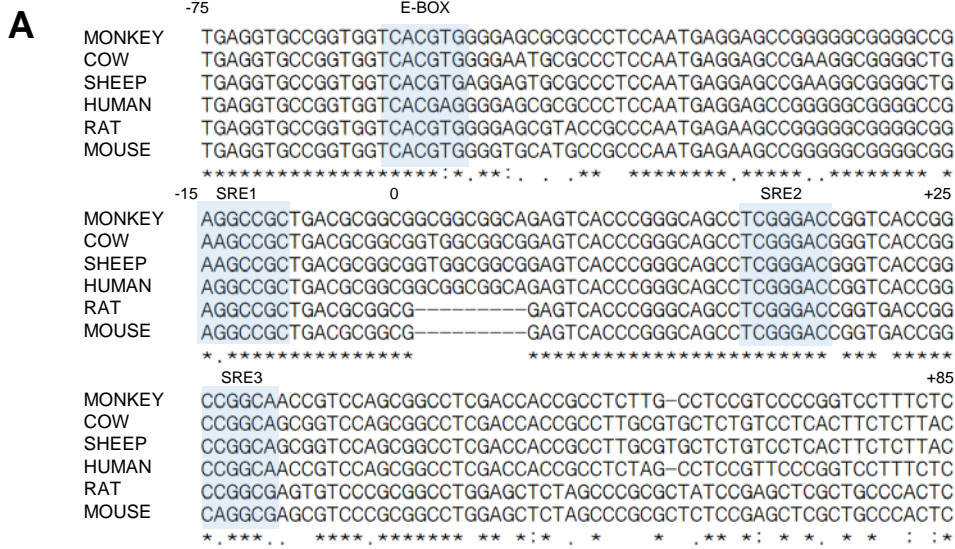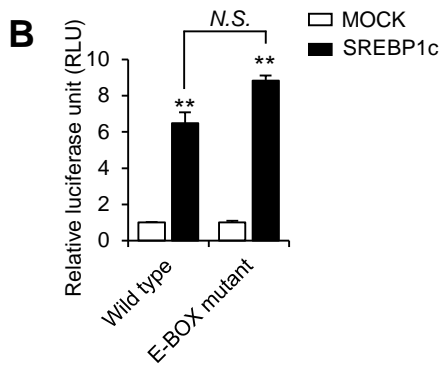

### Supplementary Figure 3. CRY1 promoter analysis using luciferase assay

(A) SRE motifs and E-BOX sequences in the CRY1 promoter from various species. (B) HEK293T cells were co-transfected with a reporter plasmid containing the WT or E-BOX mutant mouse CRY1 promoter along with expression plasmids encoding either MOCK or SREBP1c. The values represent the mean  $\pm$  SD (N=4 for each group). \*P<0.05, \*\*P<0.01 (Student's *t*-test).

## Supplementary Figure 4

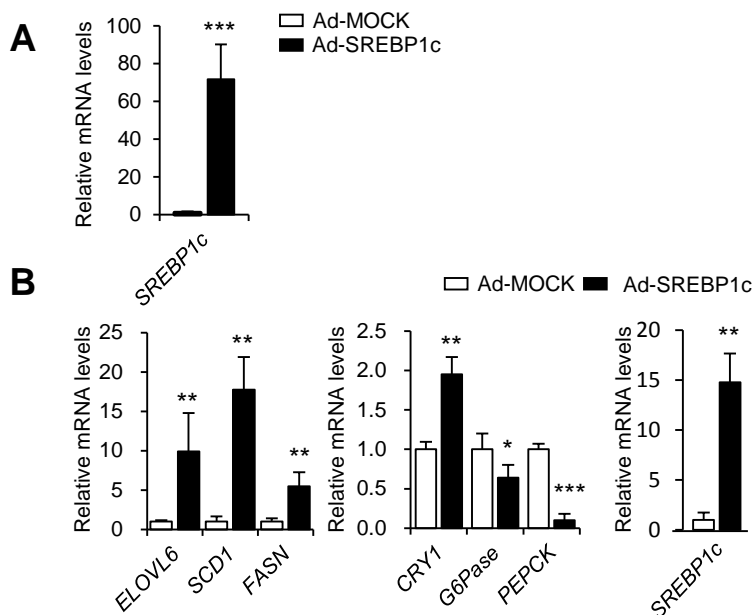

### Supplementary Figure 4. Gene expression profiles

(A) Mouse primary hepatocytes were adenovirally infected with Ad-MOCK or Ad-SREBP1c in Figure 2A and 2B. The levels of the *SREBP1c* mRNA were determined using qRT-PCR with normalization to *TBP* mRNA levels. Data are represented as mean  $\pm$ SD,  $N=3$  for each group. \* $P<0.05$ , \*\* $P<0.01$ , \*\*\* $P<0.001$  (Student's *t*-test). (B) *C57BL/6* mice were infected with adenoviruses encoding either MOCK or SREBP1c (adenoviral dose of  $5 \times 10^9$  viral particles per mouse) through the tail vein in Figure 3B. Mice were sacrificed 5 days following the injection of adenoviruses and relative mRNA levels were determined by qRT-PCR and normalized to the *TBP* mRNA levels. Data are represented as mean  $\pm$ SD,  $N=3-4$  for each group. \* $P<0.05$ , \*\* $P<0.01$ , \*\*\* $P<0.001$  (Student's *t*-test).

## Supplementary Figure 5

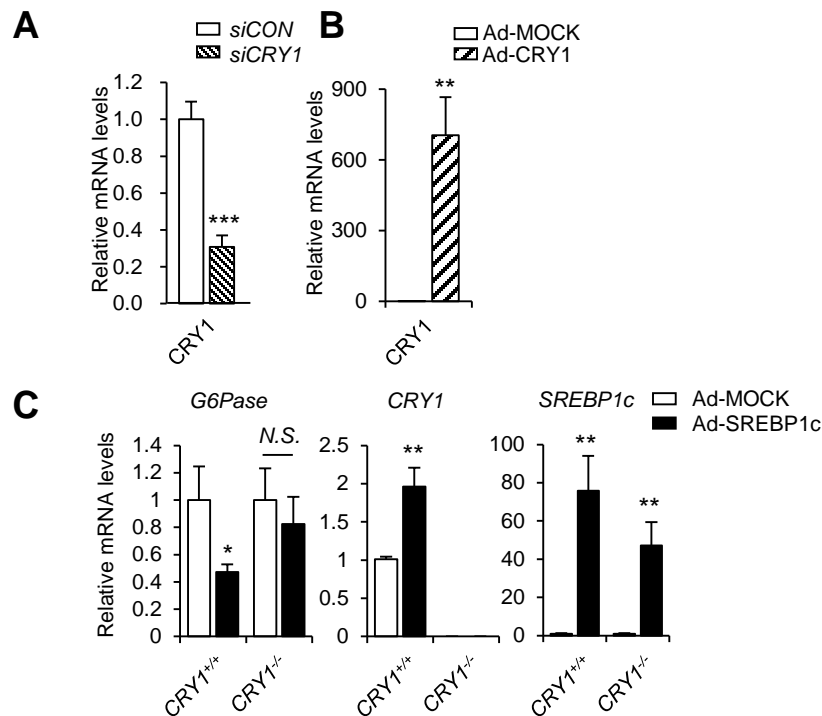

### Supplementary Figure 5. Gene expression profiles

(A) H4IIE cells were transfected with siCON or siCRY1 as shown in Figure 3G. Relative *CRY1* mRNA levels were determined by qRT-PCR and normalized to *cyclophilin* mRNA levels. Data are represented as mean  $\pm$ SD,  $N=3$  for each group. \*\*\* $P<0.001$  (Student's *t*-test). (B) Mouse primary hepatocytes were infected with Ad-MOCK or Ad-CRY1 in Figure 3H. Relative *CRY1* mRNA levels were determined by qRT-PCR and normalized to *TBP* mRNA levels. Data are represented as mean  $\pm$ SD,  $N=3$  for each group. \*\* $P<0.01$  (Student's *t*-test). (C) Mouse primary hepatocytes isolated from *CRY1*<sup>+/+</sup> and *CRY1*<sup>-/-</sup> mice were infected with Ad-MOCK or Ad-SREBP1c in Figure 3K. Relative mRNA levels were determined by qRT-PCR and normalized to *TBP* mRNA levels. Data are represented as mean  $\pm$ SD,  $N=3$  for each group. \*\* $P<0.01$  (Student's *t*-test).

## Supplementary Figure 6

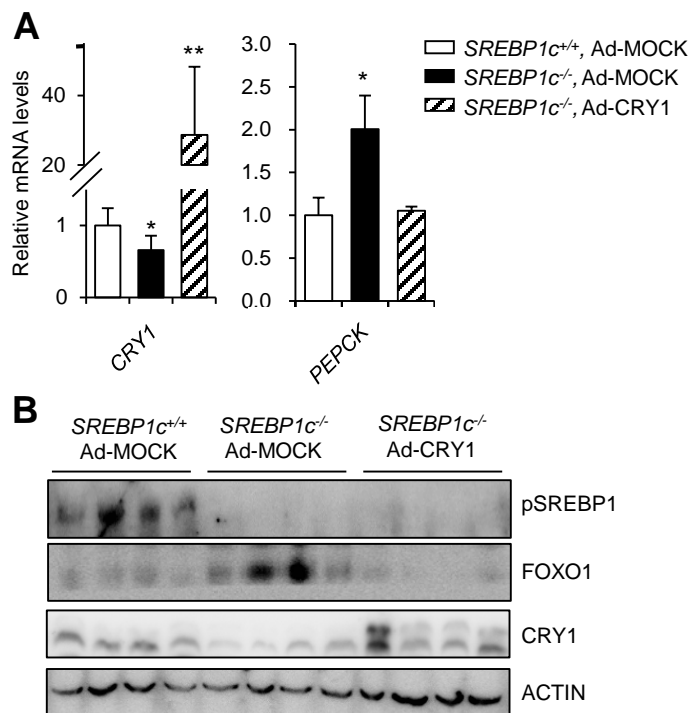

### Supplementary Figure 6. CRY1 overexpression reduces *PEPCK* mRNA and FOXO1 protein levels in *SREBP1c*<sup>-/-</sup> mice

(A and B) *SREBP1c*<sup>+/+</sup> mice injected with Ad-MOCK and in *SREBP1c*<sup>-/-</sup> mice injected with either Ad-MOCK or Ad-CRY1 in Figure 3L and 3M. In the liver, levels of the mRNA (A) and protein (B) were determined using qRT-PCR with normalization to *TBP* mRNA levels and western blotting, respectively. Data are represented as mean  $\pm$ SD,  $N=7\sim 10$  for each group. \* $P<0.05$ , \*\* $P<0.01$  (Student's *t*-test).

## Supplementary Figure 7

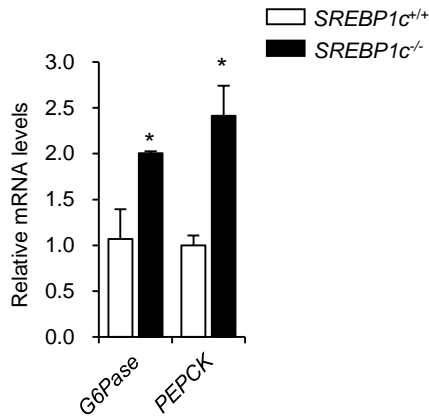

### Supplementary Figure 7. Gluconeogenic gene expression is elevated in *SREBP1c*<sup>-/-</sup> mice

In the liver, the levels of the *G6Pase* and *PEPCK* mRNA were determined using qRT-PCR with normalization to *TBP* mRNA levels. Data are represented as mean  $\pm$ SD,  $N=3\sim 4$  for each group.

\* $P < 0.05$  (Student's *t*-test).

## Supplementary Figure 8

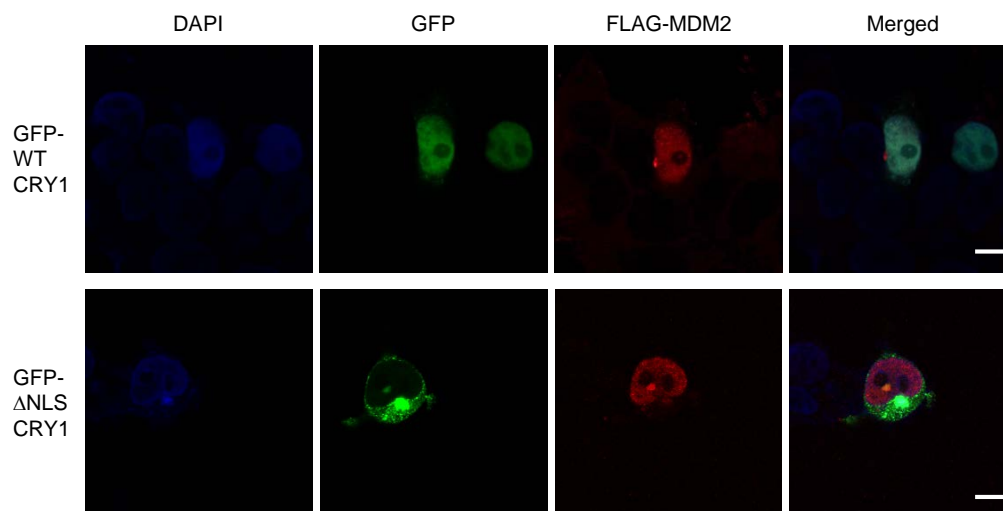

### Supplementary Figure 8. MDM2 subcellular localization in WT CRY1 and cytosolic CRY1 overexpressing cells

FLAG-MDM2 was co-transfected with GFP-WT CRY1 or GFP-cytosolic CRY1 ( $\Delta$ NLS CRY1) in HEK293T cells. Immunocytochemical analysis of FLAG-MDM2 and GFP was carried out. DAPI, 4',6-diamidino-2-phenylindole. Scale bars=10  $\mu$ m.



## Supplementary Figure 9

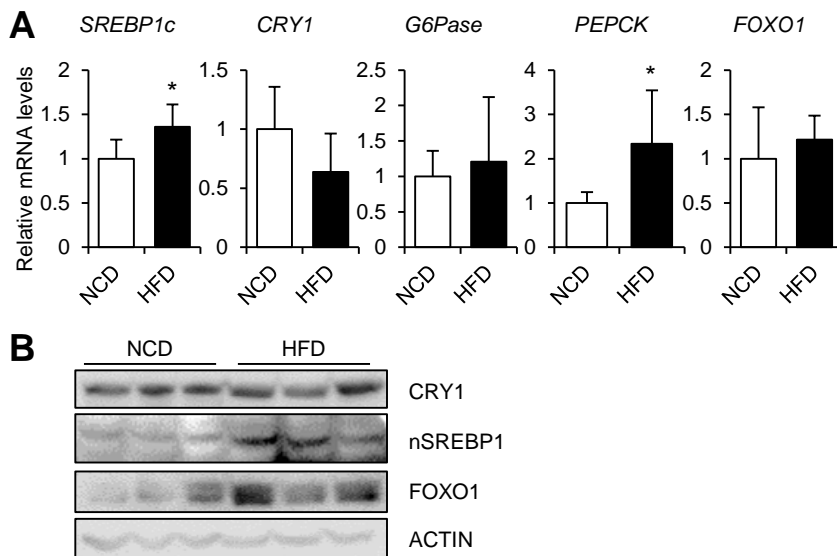

### Supplementary Figure 9. Expression profiles of various genes in the liver of NCD and HFD fed mice

(A and B) Eight-week-old *C57BL/6* mice were fed a NCD or HFD for 8 weeks and sacrificed at ZT3. Hepatic gene expression levels (A) were determined by qRT-PCR and normalized by the level of the *TBP* mRNA. N=5 in each group. Hepatic protein levels (B) were analyzed by western blotting.

## Supplementary Figure 10

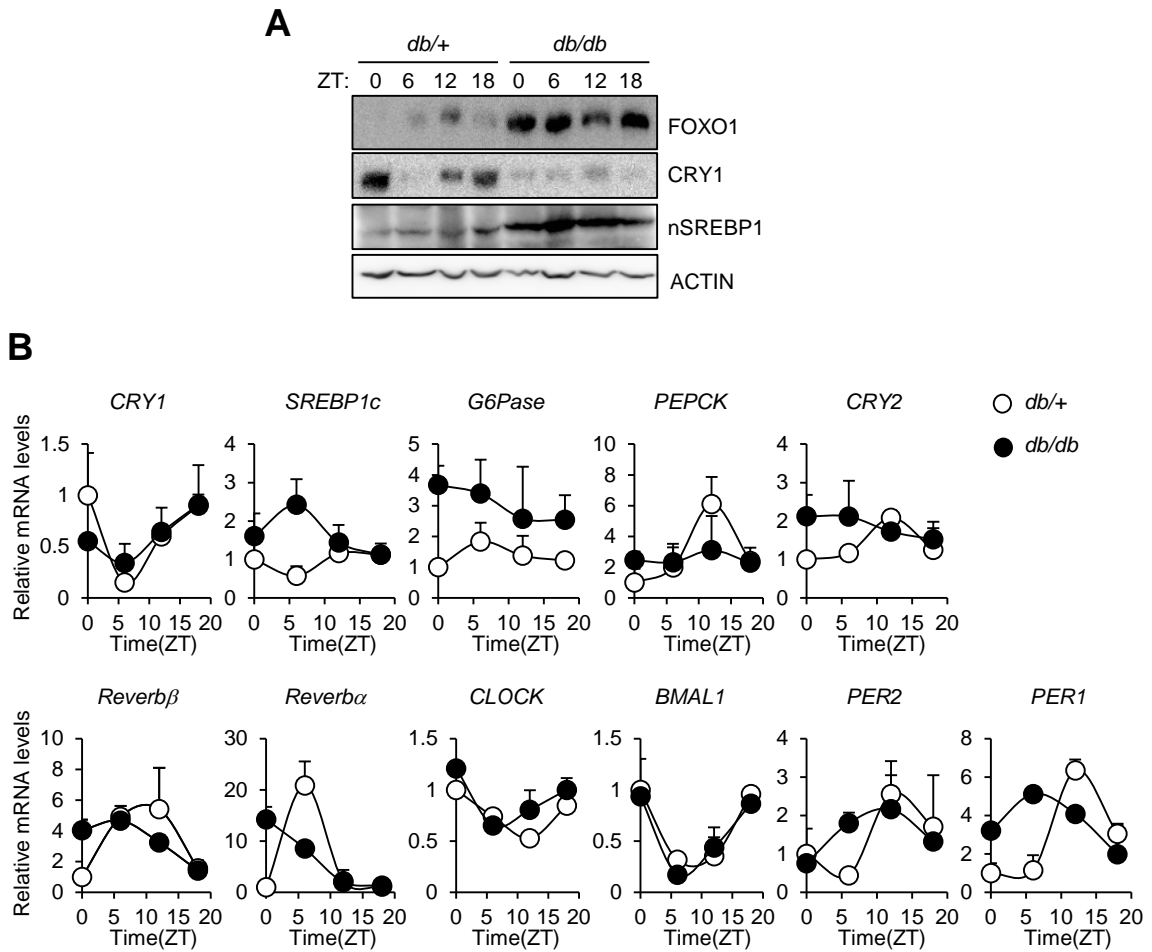

### Supplementary Figure 10. Diurnal gene expression profiles of *db/+* and *db/db* mice liver

(A and B) Ten-week-old male *db/+* and *db/db* mice were sacrificed at ZT 0, 6, 12, and 18. Protein levels (A) were determined with western blotting. The relative mRNA levels of various hepatic genes (B) were determined by qRT-PCR analyses and normalized to the *TBP* mRNA level. Data are represented as mean  $\pm$ SD,  $N=2$  for each group.

## Supplementary Figure 11

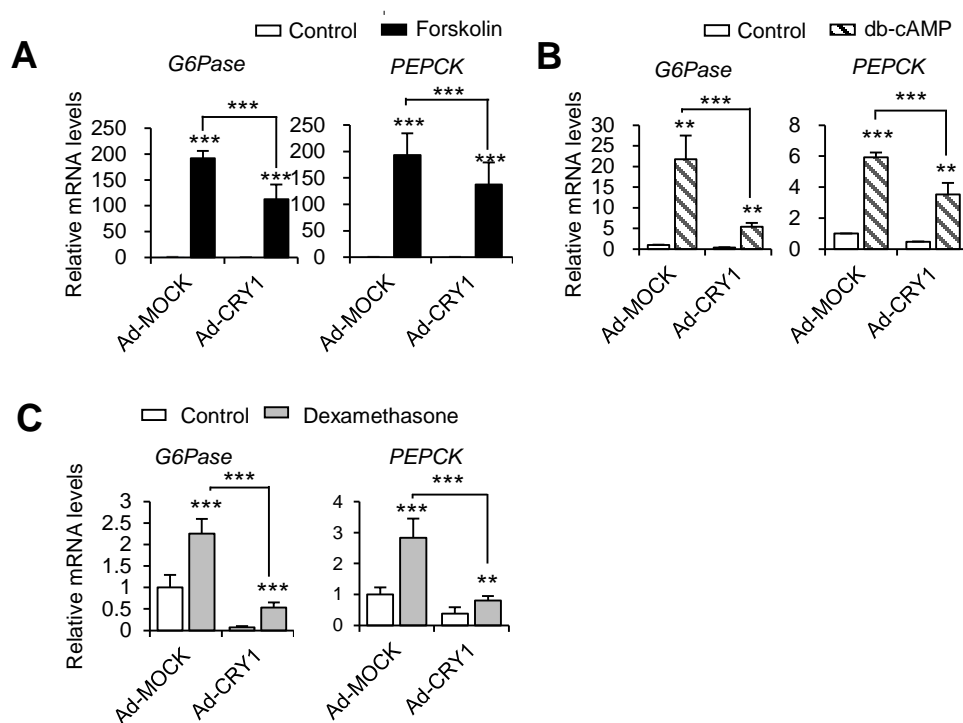

### Supplementary Figure 11. Gluconeogenic gene expression is partially attenuated by CRY1 overexpression upon incubation with forskolin, db-cAMP, and dexamethasone

(A, B and C) Mouse primary hepatocytes were adenovirally infected with Ad-MOCK or Ad-CRY1. The cells were treated with 10  $\mu$ M forskolin (A), 5  $\mu$ M db-cAMP (B), and 1  $\mu$ M dexamethasone (C) or vehicle (Control) for 4 hours. *PEPCK* and *G6Pase* mRNA levels were determined using qRT-PCR and normalized to the level of the *TBP* mRNA. The values represent the mean  $\pm$  SD (N=3 for each group). \*P<0.05, \*\*P<0.01, \*\*\*P<0.001 (Student's *t*-test).

**Supplementary Figure 12**

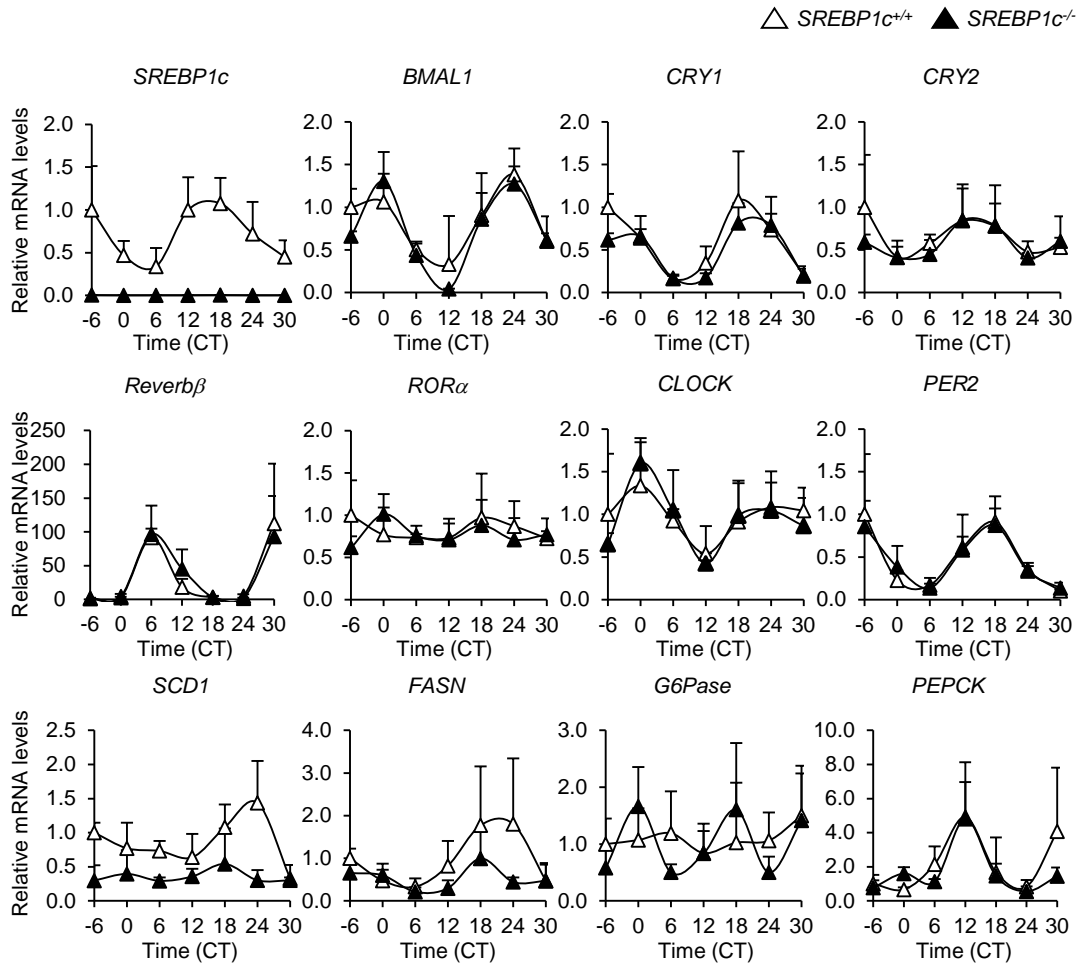

**Supplementary Figure 12. Expression profiles of various genes in the liver of *SREBP1c*<sup>+/+</sup> and *SREBP1c*<sup>-/-</sup> mice**

Livers were isolated every 6 hours from *SREBP1c*<sup>+/+</sup> and *SREBP1c*<sup>-/-</sup> mice fed with normal chow diet and kept under 12 hours: dark, 12 hours: dark cycle for 1 week. Relative mRNA levels were determined by qRT-PCR and normalized by the level of the *TBP* mRNA. N=3-4 at each time point.

# Supplementary Figure 13

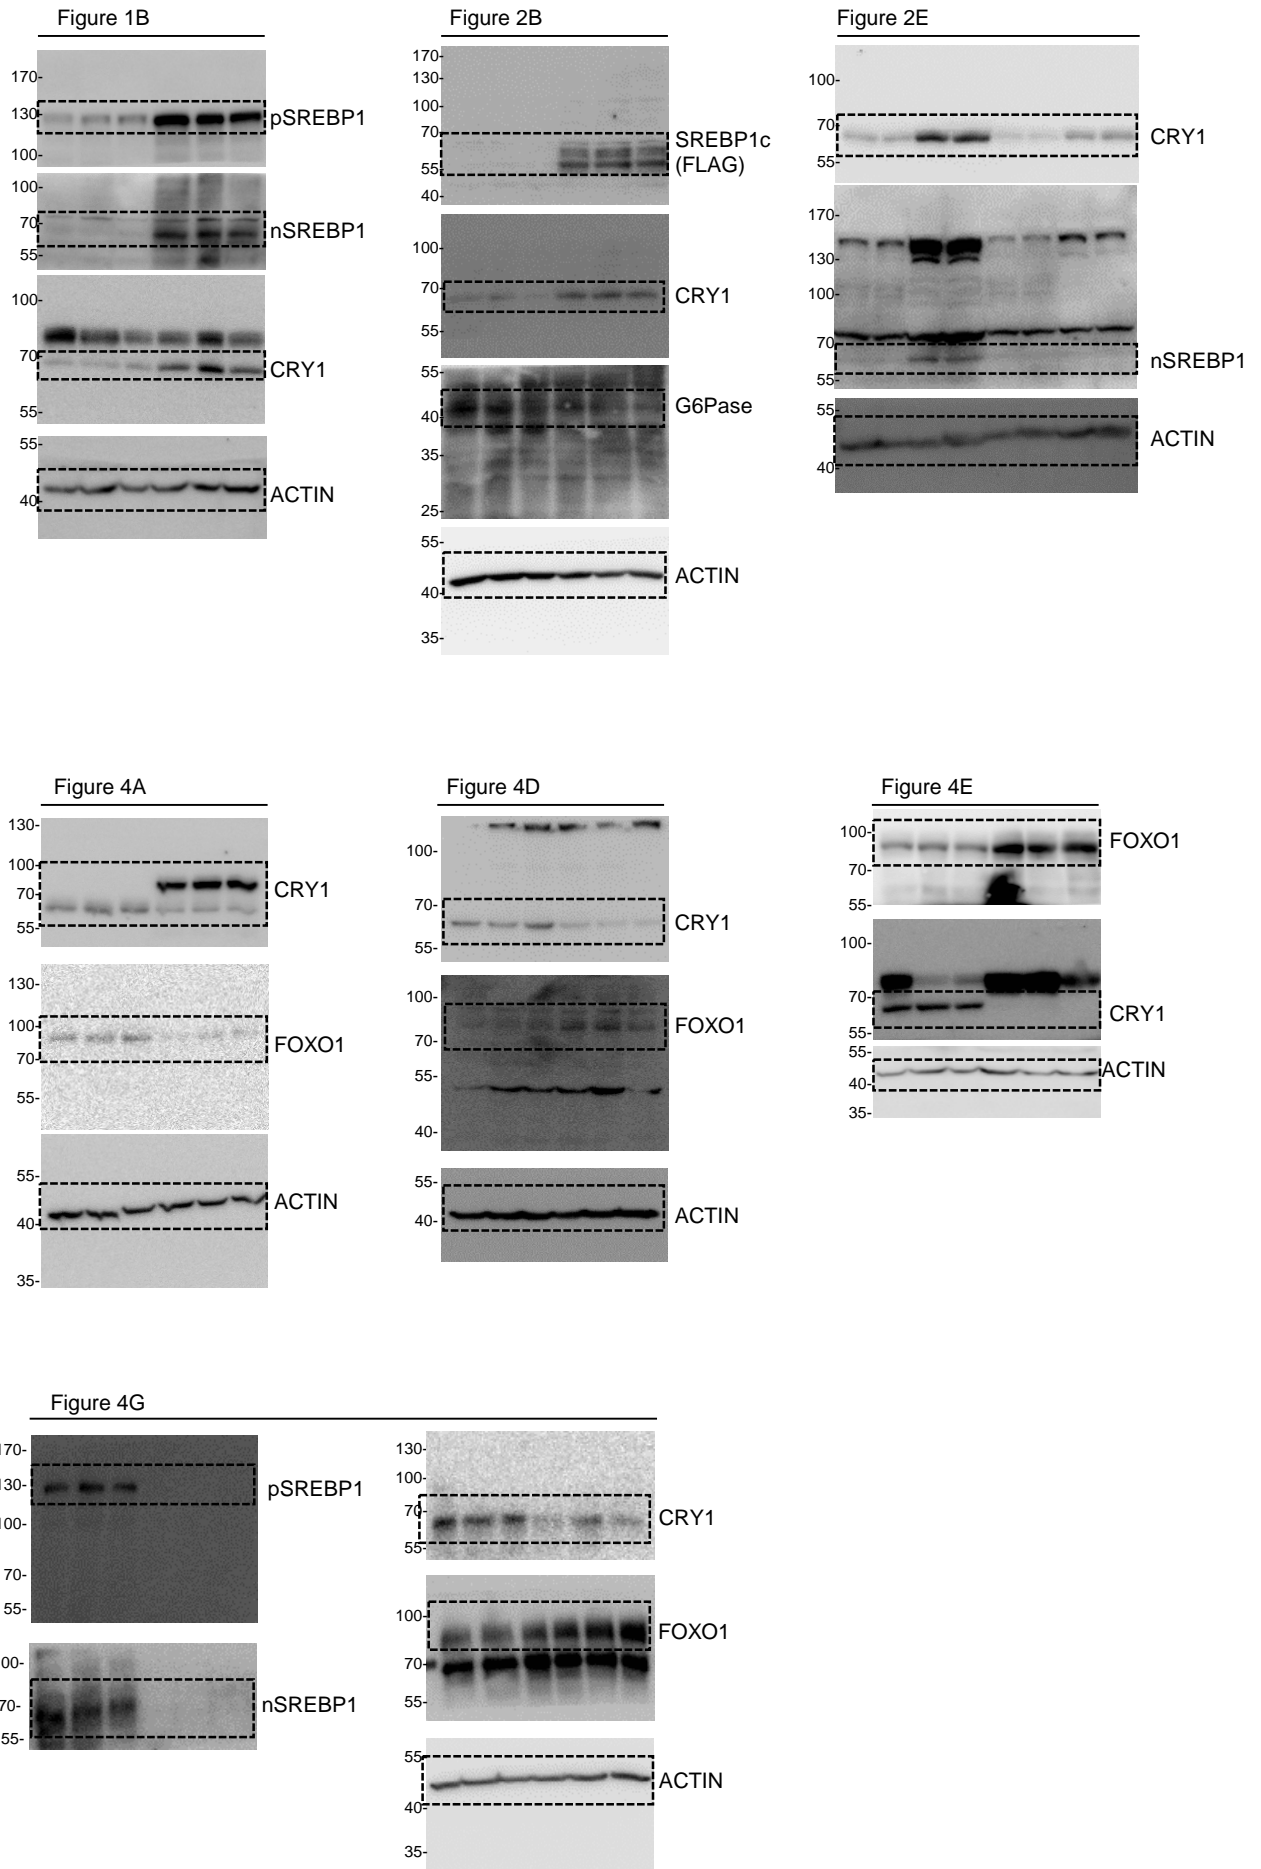

Figure 5A

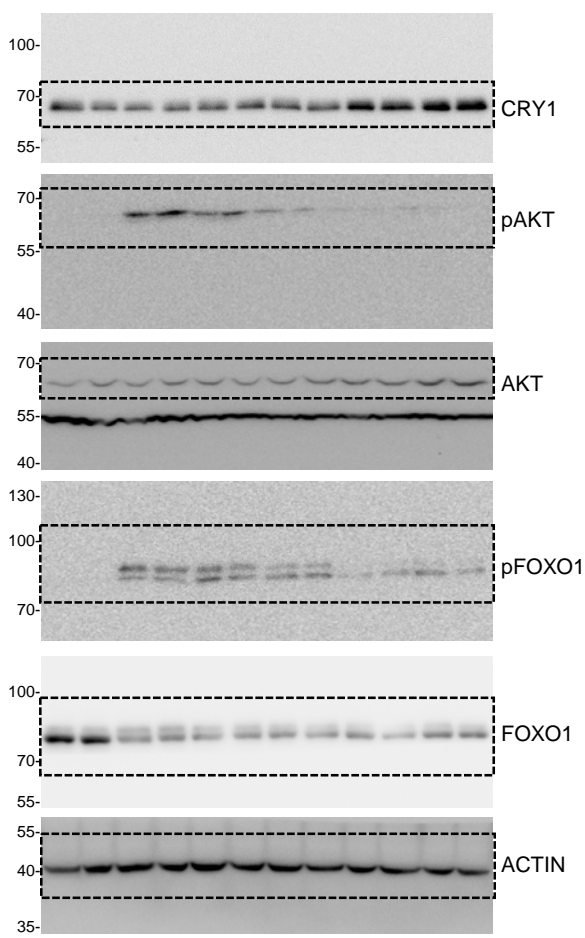

Figure 5C

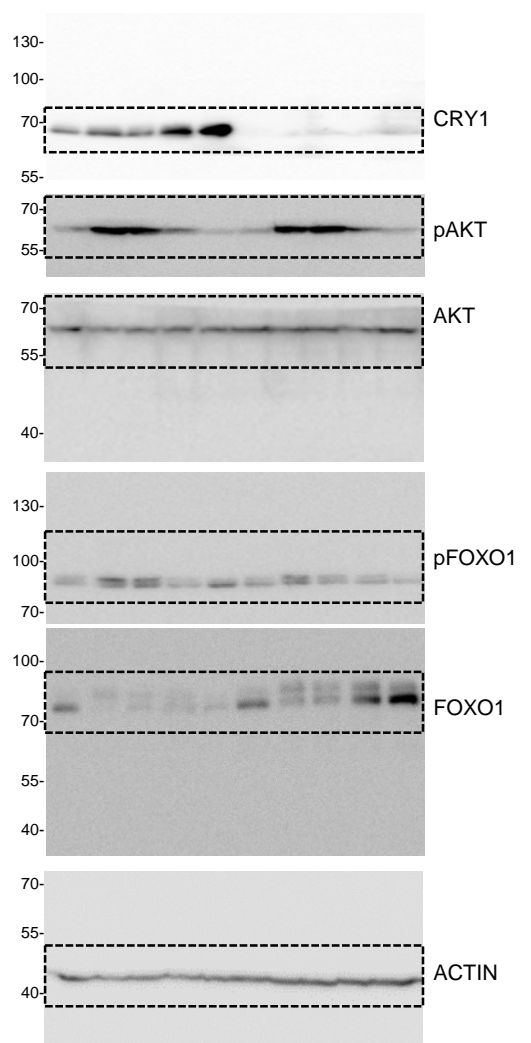

Figure 5F

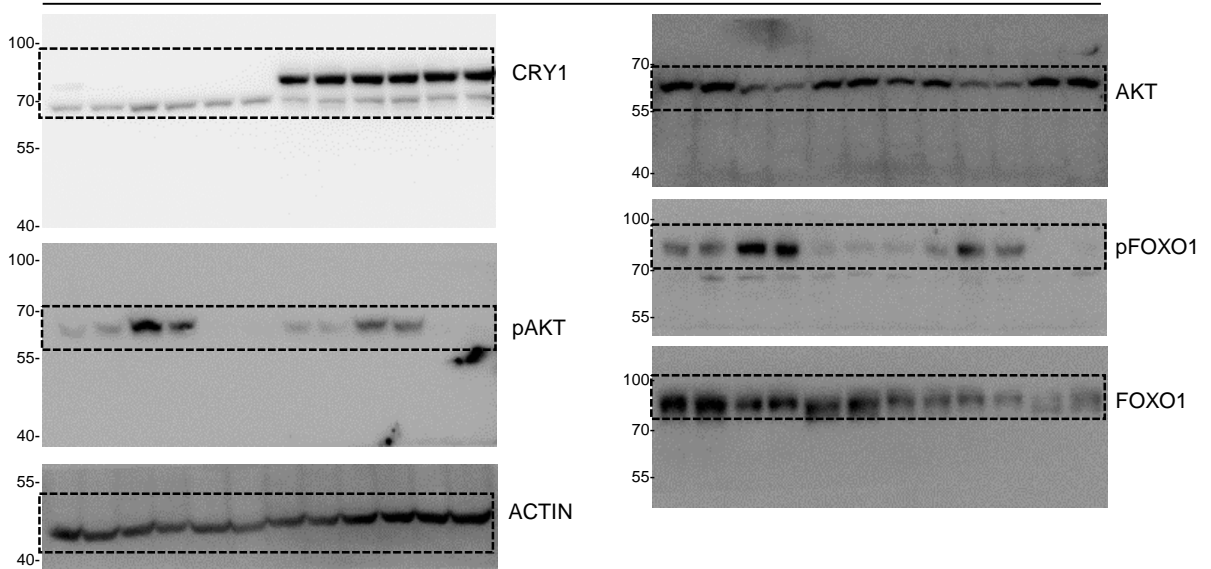

Figure 5I

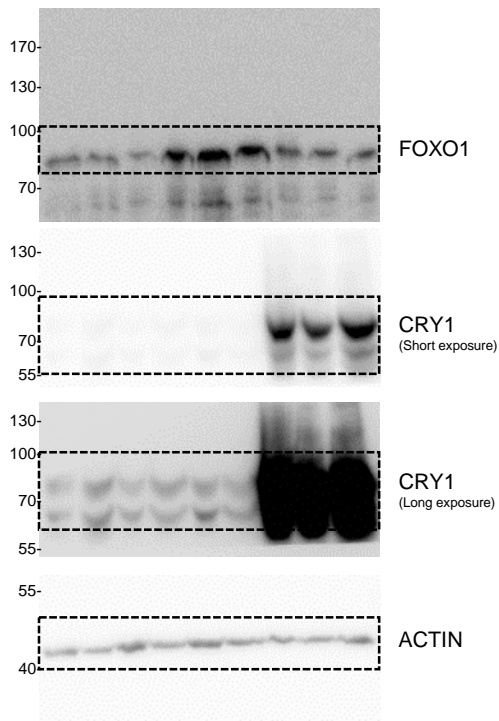

Figure 6A

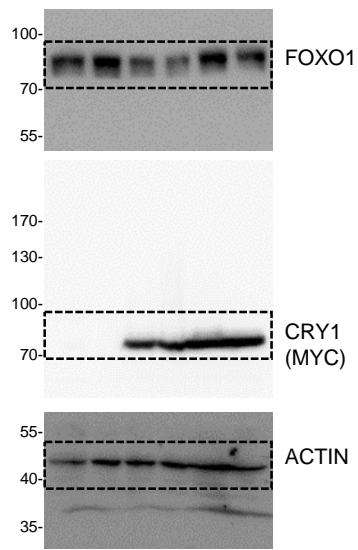

Figure 6B

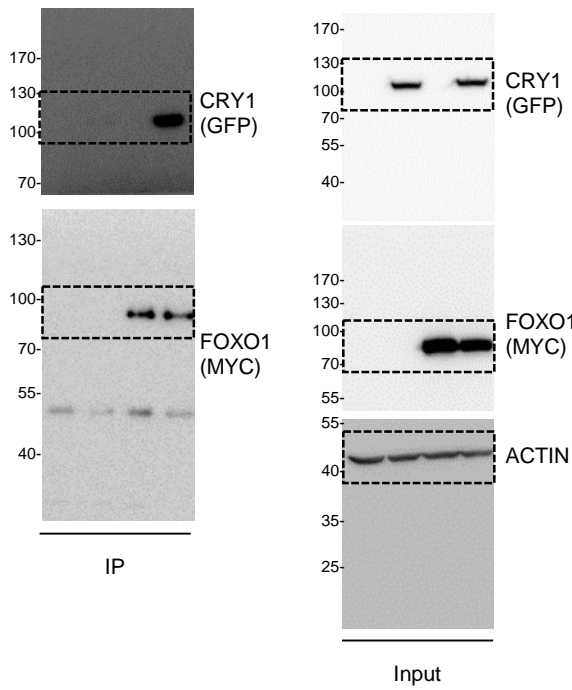

Figure 6C

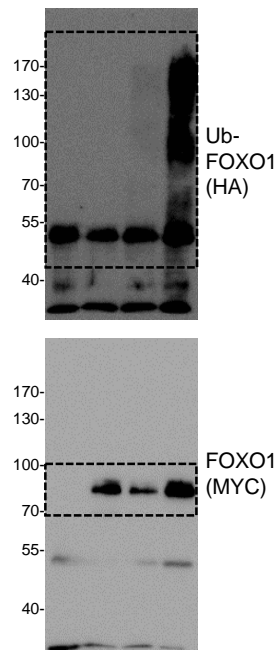

Figure 6D

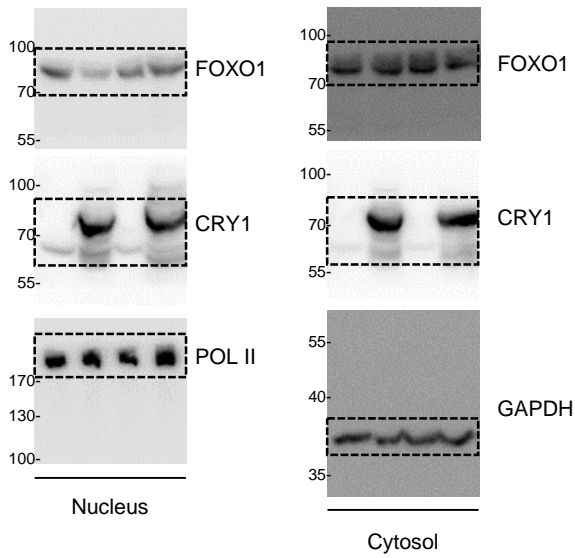

Figure 6E

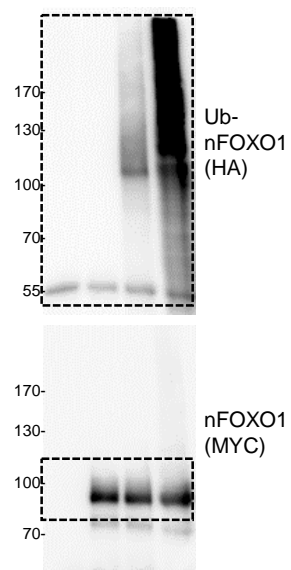

Figure 7A

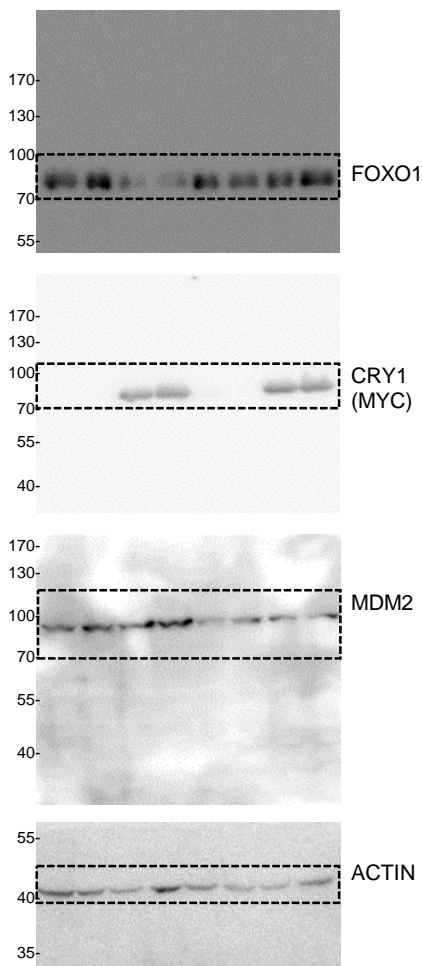

Figure 7B

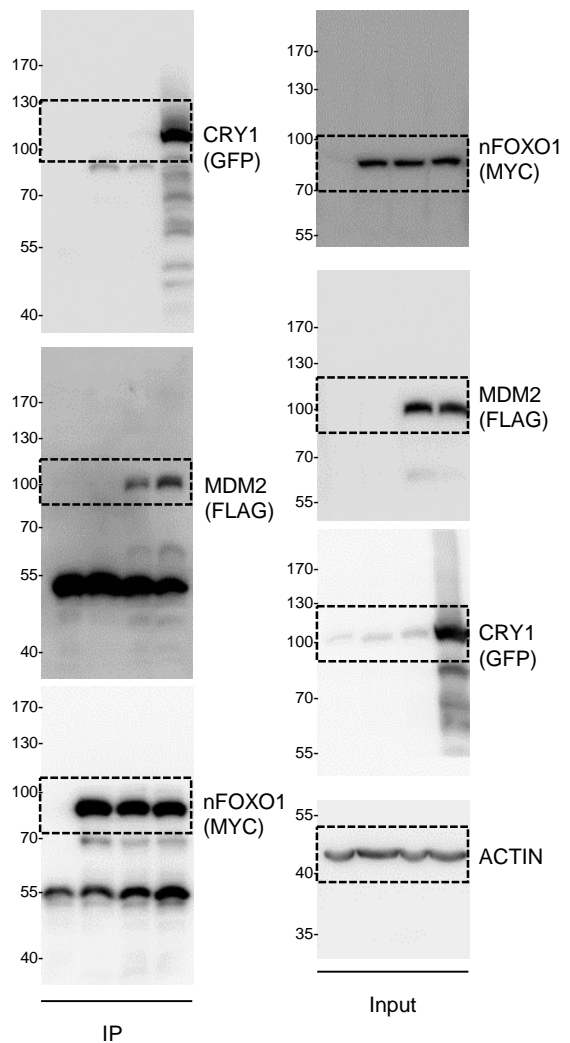



Figure 7C

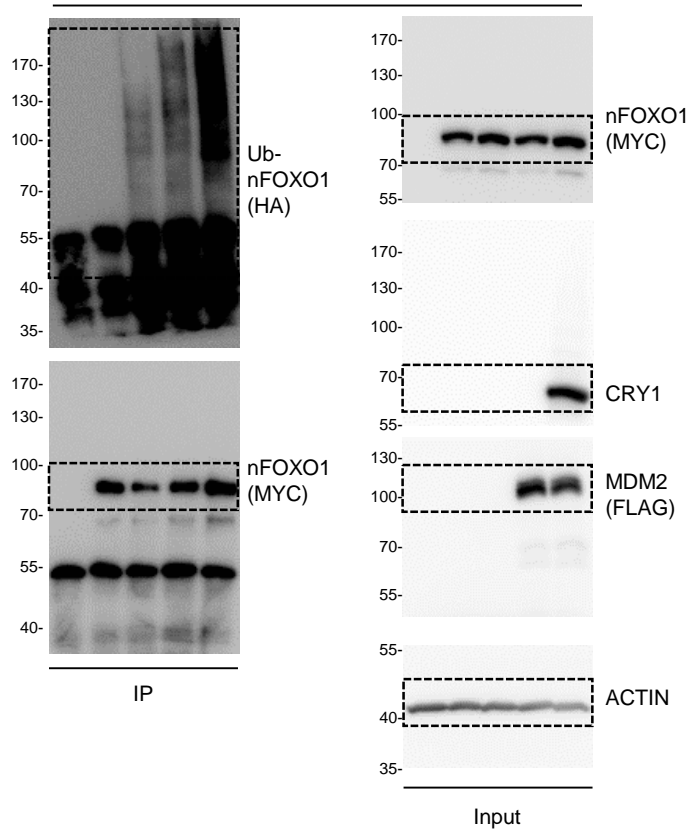

Figure 7C

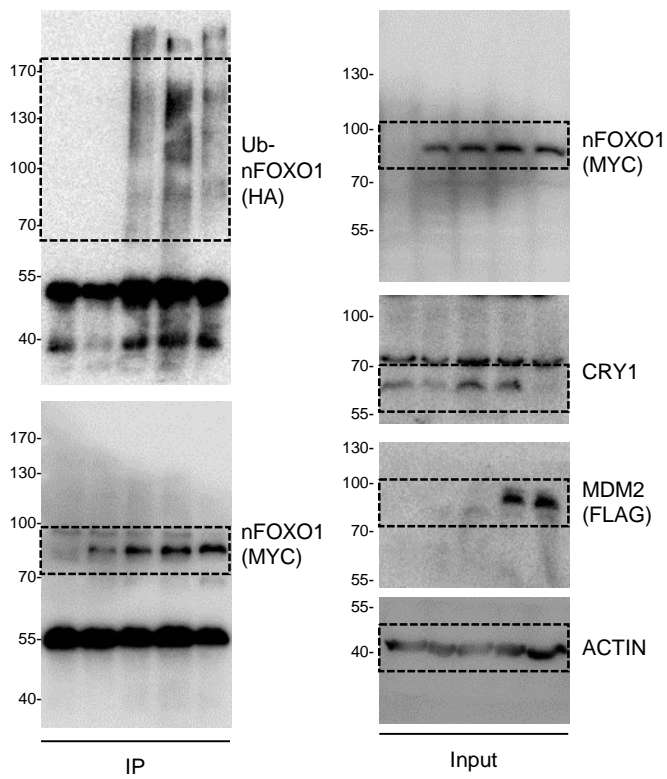

Figure 8B

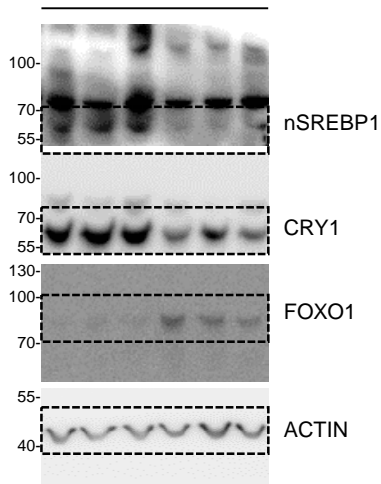

Figure 8F

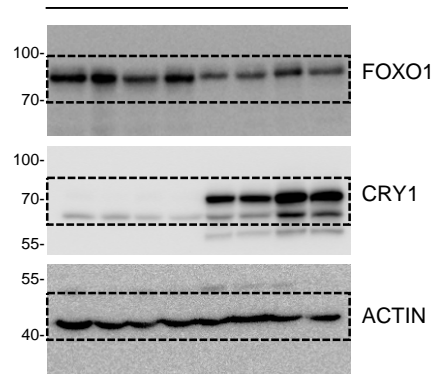

Figure 8H

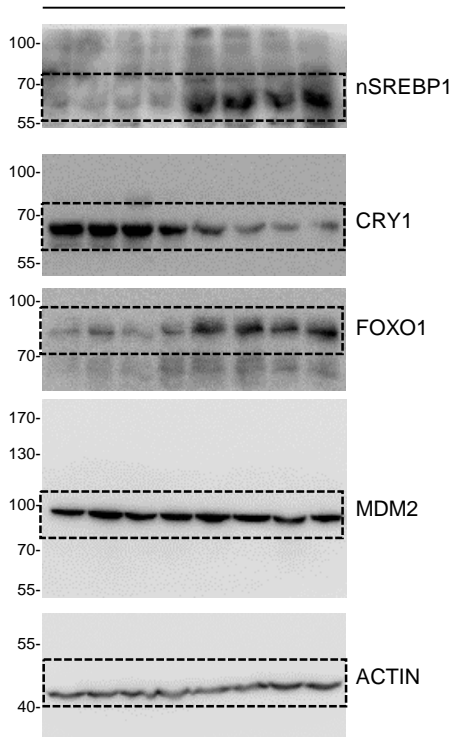

Figure 8K

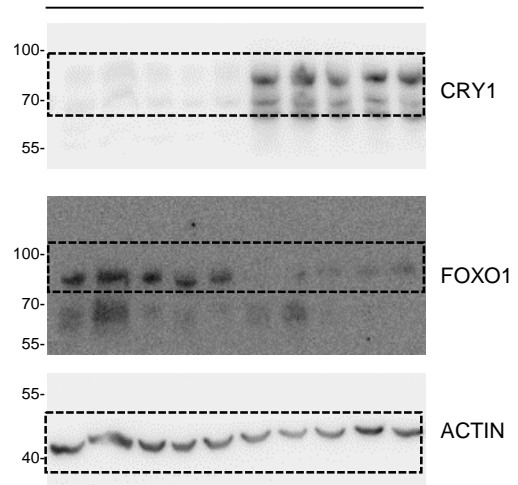

Supplementary figure 1B

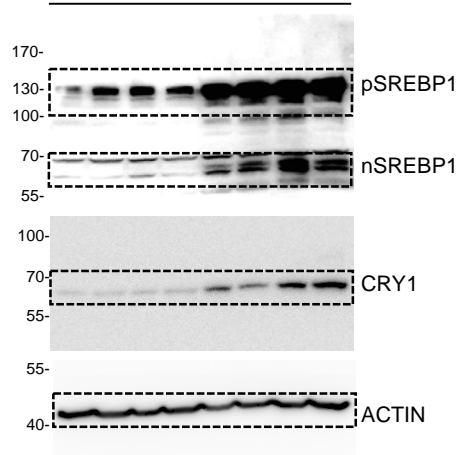

Supplementary figure 2A

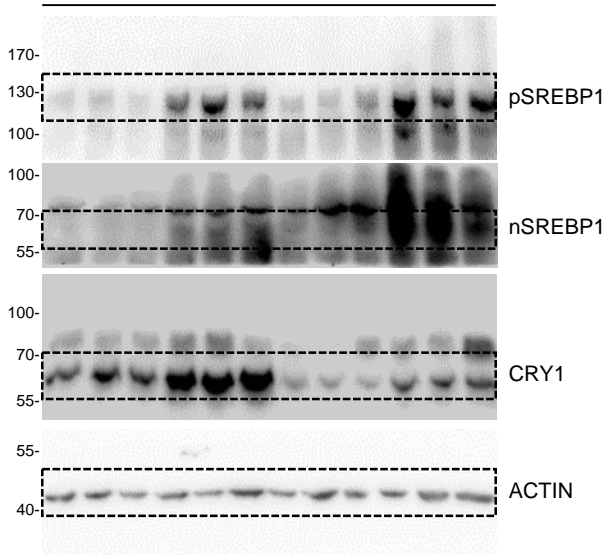

Supplementary figure 6B

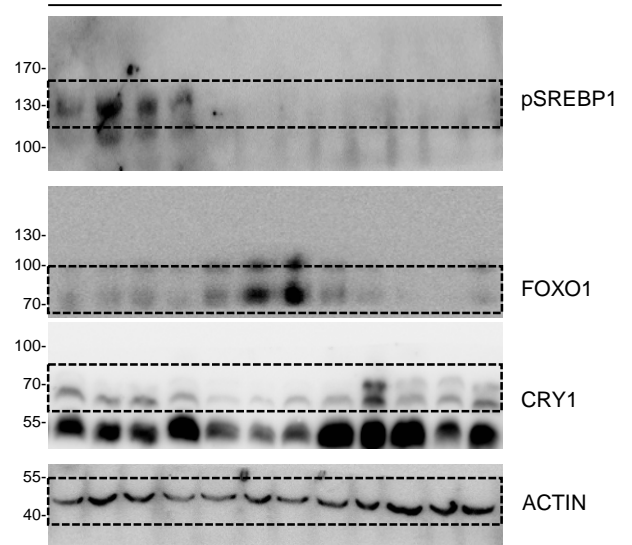

Supplementary figure 9B

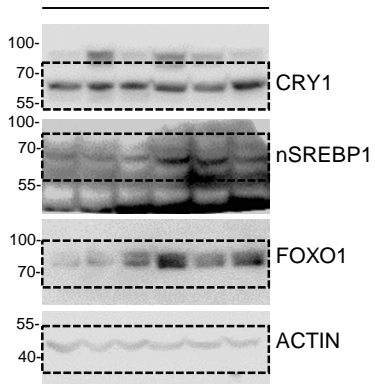

Supplementary figure 9B

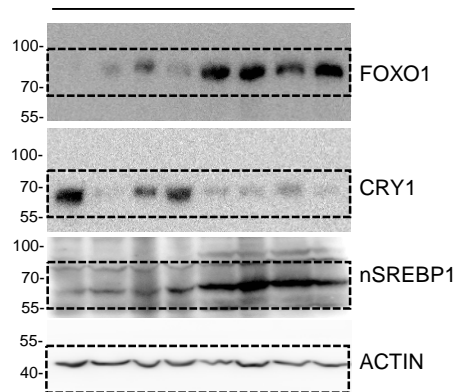

**Supplementary Figure 13. The original full immunoblot presented in main figures and supplementary figures**

**Supplementary Table 1. Sequence of primers for q-RT-PCR**

| Primer           | Sequences                                                               |
|------------------|-------------------------------------------------------------------------|
| mrSREBP1c        | Sense 5'-GGAGCCATGGATTGCACATT<br>Antisense 5'-CAGGAAGGCTTCCAGAGAGG      |
| mrCRY1           | Sense 5'-CGTTTGAAAGGCATTTGG<br>Antisense 5'-CTTCCATTTGTCAAAGCGTG        |
| mrPEPCK          | Sense 5'-AGCCTTTGGTCAACAACCTGG<br>Antisense 5'-TGCCTTCGGGGTTAGTTATG     |
| mrG6Pase         | Sense 5'-ACACCGACTACTACAGCAACAG<br>Antisense 5'-CCTCGAAAGATAGCAAGAGTAG  |
| hmrFOXO1         | Sense 5'-CCAAGGCCATCGAGAGC<br>Antisense 5'-GATTGAGCATCCACCAAGAACT       |
| hmFASN           | Sense 5'-GCTGCGGAAACTTCAGGAAAT<br>Antisense 5'-AGAGACGTGTCACTCCTGGACTT  |
| mBMAL1           | Sense 5'-AACCTTCCCGCAGCTAACAG<br>Antisense 5'-AGTCTCTTTGGGCCACCTT       |
| mCLOCK           | Sense 5'-TTGCGTCTGTGGGTGTTG<br>Antisense 5'-TGCTTTGCCTTGTCATCTTCT       |
| mPER2            | Sense 5'-TGTGCGATGATGATTCTGTA<br>Antisense 5'-GGTGAAGGTACGTTTGGTTTGC    |
| hmrCRY2          | Sense 5'-GGAGCTGCCCAAGAAGC<br>Antisense 5'-AGTAGAAGAGGCGGCAGGA          |
| mSCD1            | Sense 5'-CCGGAGACCCCTTAGATCGA<br>Antisense 5'-TAGCCTGTAAAGATTTCTGCAAACC |
| mELOVL6          | Sense 5'-TGCCATGTTTCATCACCTTGT<br>Antisense 5'-TACTCAGCCTTCGTGGCTTT     |
| mTBP             | Sense 5'-GGGAGAATCATGGACCAGAA<br>Antisense 5'-CCGTAAGGCATCATTGGACT      |
| mPER1            | Sense 5'-GGGAGCTCAAACCTTCGACTG<br>Antisense 5'-TCGGATGTGATATGCTCCAA     |
| mREVERB $\alpha$ | Sense 5'-CTGGAGGGCTGCAGTATAGC<br>Antisense 5'-TATTGGAGTCCAGGGTCGTC      |
| mREVERB $\beta$  | Sense 5'-TCCTCTAGCTCTGCCTCCAG<br>Antisense 5'-TGGTTTTGCCTGTTTTACA       |

(m: mouse, h: human, r: rat)

## Supplementary Table 2. siRNA Sequences

| Primer           | Sequences              |
|------------------|------------------------|
| Rat FOXO1        | 5'-GAAUGAAGGAACUGGGAAA |
| Mouse CRY1       | 5'-CCUCGCAACUGAAGUUGGU |
| Mouse MDM2       | 5'-CAGAGAAUGAUGGUAAGA  |
| Negative Control | 5'-CCUACGCCACCAAUUUCGU |
